# Supplementary material for: Modeling and Analysis of Photo-Voltaic Solar Panel under Constant Electric Load
Source: Hindawi journal article supplement (doi:10.1155/2019/9639480), 2019-08-01
Supplement: f1 [file 9639480.f1.xlsx]

## Sheet: Sheet1
National meteorological agency
Name	JIJIGA
Element	Air temprature and global radiation
Date	Time	Pyranometer SP-Lite and CMP3 (W/m²)	Temperature (°C)
2015-01-01	00:00:00	0.4	10.2
2015-01-01	00:15:00	0.4	9.7
2015-01-01	00:30:00	0.3	9.9
2015-01-01	00:45:00	0.3	9.3
2015-01-01	01:00:00	0.4	9.2
2015-01-01	01:15:00	0.4	9.7
2015-01-01	01:30:00	0.3	9.7
2015-01-01	01:45:00	0.4	9.3
2015-01-01	02:00:00	0.3	8.7
2015-01-01	02:15:00	0.4	9
2015-01-01	02:30:00	0.3	8.3
2015-01-01	02:45:00	0.3	7.6
2015-01-01	03:00:00	0.4	6.6
2015-01-01	03:15:00	0.4	6.1
2015-01-01	03:30:00	0.4	6.1
2015-01-01	03:45:00	0.4	6.4
2015-01-01	04:00:00	0.4	7.2
2015-01-01	04:15:00	0.4	7.3
2015-01-01	04:30:00	0.4	7.2
2015-01-01	04:45:00	0.4	6.8
2015-01-01	05:00:00	0.3	5.5
2015-01-01	05:15:00	0.4	5.5
2015-01-01	05:30:00	0.4	5.3
2015-01-01	05:45:00	0.4	5.9
2015-01-01	06:00:00	0.4	5.2
2015-01-01	06:15:00	0.9	3.7
2015-01-01	06:30:00	4.1	2.8
2015-01-01	06:45:00	10.4	4
2015-01-01	07:00:00	21.8	4.3
2015-01-01	07:15:00	110.8	5.9
2015-01-01	07:30:00	158	8.3
2015-01-01	07:45:00	210	10.5
2015-01-01	08:00:00	265	11.6
2015-01-01	08:15:00	319.9	13.2
2015-01-01	08:30:00	373.9	15.6
2015-01-01	08:45:00	428.5	17.8
2015-01-01	09:00:00	478.7	19.9
2015-01-01	09:15:00	528	20.8
2015-01-01	09:30:00	574.4	21.2
2015-01-01	09:45:00	620.8	21.9
2015-01-01	10:00:00	660.1	22.4
2015-01-01	10:15:00	693	22.7
2015-01-01	10:30:00	724.9	23.2
2015-01-01	10:45:00	751	23.5
2015-01-01	11:00:00	770.7	23.7
2015-01-01	11:15:00	792.6	24.2
2015-01-01	11:30:00	806.8	24.2
2015-01-01	11:45:00	821.8	24.7
2015-01-01	12:00:00	825.7	24.8
2015-01-01	12:15:00	836.3	25.1
2015-01-01	12:30:00	835.5	25.1
2015-01-01	12:45:00	829	25.2
2015-01-01	13:00:00	812.5	25
2015-01-01	13:15:00	788.8	25.3
2015-01-01	13:30:00	770.1	25.6
2015-01-01	13:45:00	747.1	25.6
2015-01-01	14:00:00	718.9	26
2015-01-01	14:15:00	688.5	25.7
2015-01-01	14:30:00	655.5	25.5
2015-01-01	14:45:00	613.7	25.2
2015-01-01	15:00:00	573.4	25.4
2015-01-01	15:15:00	528	25.3
2015-01-01	15:30:00	482.9	25.3
2015-01-01	15:45:00	435	25.2
2015-01-01	16:00:00	387	24.8
2015-01-01	16:15:00	335	24.8
2015-01-01	16:30:00	277.1	24.4
2015-01-01	16:45:00	224.2	24
2015-01-01	17:00:00	172	23.6
2015-01-01	17:15:00	122.4	23.3
2015-01-01	17:30:00	79.8	22.5
2015-01-01	17:45:00	34	21.8
2015-01-01	18:00:00	7.8	20.9
2015-01-01	18:15:00	2.1	20.1
2015-01-01	18:30:00	0.5	19.1
2015-01-01	18:45:00	0.4	18.2
2015-01-01	19:00:00	0.4	17
2015-01-01	19:15:00	0.4	16
2015-01-01	19:30:00	0.3	15.6
2015-01-01	19:45:00	0.4	14.9
2015-01-01	20:00:00	0.4	13.6
2015-01-01	20:15:00	0.4	13.3
2015-01-01	20:30:00	0.4	12.8
2015-01-01	20:45:00	0.4	12
2015-01-01	21:00:00	0.3	11.6
2015-01-01	21:15:00	0.4	10.4
2015-01-01	21:30:00	0.4	9.8
2015-01-01	21:45:00	0.4	9.3
2015-01-01	22:00:00	0.4	8.8
2015-01-01	22:15:00	0.4	8.6
2015-01-01	22:30:00	0.4	8
2015-01-01	22:45:00	0.4	7.6
2015-01-01	23:00:00	0.4	7.8
2015-01-01	23:15:00	0.4	7.6
2015-01-01	23:30:00	0.4	7.3
2015-01-01	23:45:00	0.3	6.4
2015-02-01	00:00:00	0.4	5.9
2015-02-01	00:15:00	0.4	5.9
2015-02-01	00:30:00	0.4	5.9
2015-02-01	00:45:00	0.4	5.7
2015-02-01	01:00:00	0.4	5.2
2015-02-01	01:15:00	0.4	4.8
2015-02-01	01:30:00	0.4	4.9
2015-02-01	01:45:00	0.5	4.4
2015-02-01	02:00:00	0.4	4.2
2015-02-01	02:15:00	0.3	4
2015-02-01	02:30:00	0.4	4
2015-02-01	02:45:00	0.3	3.7
2015-02-01	03:00:00	0.4	3.6
2015-02-01	03:15:00	0.4	3.3
2015-02-01	03:30:00	0.4	3
2015-02-01	03:45:00	0.4	2.8
2015-02-01	04:00:00	0.4	3.1
2015-02-01	04:15:00	0.4	3
2015-02-01	04:30:00	0.3	2.8
2015-02-01	04:45:00	0.3	2.6
2015-02-01	05:00:00	0.4	2.5
2015-02-01	05:15:00	0.4	2.7
2015-02-01	05:30:00	0.4	2.7
2015-02-01	05:45:00	0.4	2.4
2015-02-01	06:00:00	0.4	2.4
2015-02-01	06:15:00	0.9	2.1
2015-02-01	06:30:00	4.4	2.1
2015-02-01	06:45:00	11.2	2.3
2015-02-01	07:00:00	19.8	2.8
2015-02-01	07:15:00	106.1	4.8
2015-02-01	07:30:00	153.7	6.7
2015-02-01	07:45:00	204	8.7
2015-02-01	08:00:00	256.5	11.6
2015-02-01	08:15:00	308.9	14.7
2015-02-01	08:30:00	360.6	17.3
2015-02-01	08:45:00	419.7	18.9
2015-02-01	09:00:00	469.9	20
2015-02-01	09:15:00	520.7	21.4
2015-02-01	09:30:00	565.2	21.7
2015-02-01	09:45:00	609.5	22.3
2015-02-01	10:00:00	650.9	22.9
2015-02-01	10:15:00	683.6	22.9
2015-02-01	10:30:00	712.4	23.5
2015-02-01	10:45:00	738.7	23.7
2015-02-01	11:00:00	753.8	23.9
2015-02-01	11:15:00	781.8	24.2
2015-02-01	11:30:00	796.3	24.5
2015-02-01	11:45:00	813.3	24.9
2015-02-01	12:00:00	819.7	25.3
2015-02-01	12:15:00	829.1	25.6
2015-02-01	12:30:00	830.9	25.2
2015-02-01	12:45:00	825.1	26
2015-02-01	13:00:00	818.6	26.2
2015-02-01	13:15:00	788.9	26.3
2015-02-01	13:30:00	774.9	26
2015-02-01	13:45:00	745.8	26
2015-02-01	14:00:00	718.4	26.5
2015-02-01	14:15:00	690.3	26.5
2015-02-01	14:30:00	656.8	26.4
2015-02-01	14:45:00	617.7	26.2
2015-02-01	15:00:00	577.1	26.1
2015-02-01	15:15:00	532.7	26
2015-02-01	15:30:00	483.6	25.9
2015-02-01	15:45:00	433.2	25.6
2015-02-01	16:00:00	380.1	25.5
2015-02-01	16:15:00	326.3	25.3
2015-02-01	16:30:00	273.5	24.9
2015-02-01	16:45:00	221.4	24.6
2015-02-01	17:00:00	170	24.1
2015-02-01	17:15:00	122	23.7
2015-02-01	17:30:00	80.4	23.2
2015-02-01	17:45:00	35.4	22.6
2015-02-01	18:00:00	8.1	21.9
2015-02-01	18:15:00	2.1	21.2
2015-02-01	18:30:00	0.5	20.6
2015-02-01	18:45:00	0.4	19.8
2015-02-01	19:00:00	0.5	18.7
2015-02-01	19:15:00	0.4	17.8
2015-02-01	19:30:00	0.4	16.9
2015-02-01	19:45:00	0.4	16.6
2015-02-01	20:00:00	0.4	15.9
2015-02-01	20:15:00	0.4	15.3
2015-02-01	20:30:00	0.4	15
2015-02-01	20:45:00	0.4	14.4
2015-02-01	21:00:00	0.4	14
2015-02-01	21:15:00	0.4	13.7
2015-02-01	21:30:00	0.4	13.1
2015-02-01	21:45:00	0.4	12.3
2015-02-01	22:00:00	0.4	11.9
2015-02-01	22:15:00	0.4	12.5
2015-02-01	22:30:00	0.4	12.7
2015-02-01	22:45:00	0.4	11.9
2015-02-01	23:00:00	0.4	11.2
2015-02-01	23:15:00	0.4	10.2
2015-02-01	23:30:00	0.3	9.6
2015-02-01	23:45:00	0.4	8.9
2015-03-01	00:00:00	0.4	8.7
2015-03-01	00:15:00	0.4	8.8
2015-03-01	00:30:00	0.4	8.3
2015-03-01	00:45:00	0.4	7.8
2015-03-01	01:00:00	0.4	7.9
2015-03-01	01:15:00	0.4	7.1
2015-03-01	01:30:00	0.4	6.8
2015-03-01	01:45:00	0.4	6.3
2015-03-01	02:00:00	0.4	6
2015-03-01	02:15:00	0.3	5.7
2015-03-01	02:30:00	0.4	5.3
2015-03-01	02:45:00	0.4	5.7
2015-03-01	03:00:00	0.4	6.2
2015-03-01	03:15:00	0.4	6.2
2015-03-01	03:30:00	0.4	6.1
2015-03-01	03:45:00	0.4	5.9
2015-03-01	04:00:00	0.4	5.8
2015-03-01	04:15:00	0.4	5.4
2015-03-01	04:30:00	0.4	5.6
2015-03-01	04:45:00	0.4	5.8
2015-03-01	05:00:00	0.4	5.6
2015-03-01	05:15:00	0.4	5.4
2015-03-01	05:30:00	0.4	5.7
2015-03-01	05:45:00	0.3	5.7
2015-03-01	06:00:00	0.4	6.1
2015-03-01	06:15:00	0.9	6.7
2015-03-01	06:30:00	4.3	6.7
2015-03-01	06:45:00	11.5	7.2
2015-03-01	07:00:00	19	7.7
2015-03-01	07:15:00	100.9	8.7
2015-03-01	07:30:00	148.2	10.4
2015-03-01	07:45:00	198.6	11.8
2015-03-01	08:00:00	252.3	13.9
2015-03-01	08:15:00	305.3	16.7
2015-03-01	08:30:00	359.3	19.1
2015-03-01	08:45:00	412.7	20.4
2015-03-01	09:00:00	463.8	20.8
2015-03-01	09:15:00	511.8	21.3
2015-03-01	09:30:00	557.3	21.8
2015-03-01	09:45:00	601.7	22.2
2015-03-01	10:00:00	641.6	22.5
2015-03-01	10:15:00	675.8	22.8
2015-03-01	10:30:00	703.8	23.3
2015-03-01	10:45:00	736.6	23.3
2015-03-01	11:00:00	758.8	23.4
2015-03-01	11:15:00	781	23.8
2015-03-01	11:30:00	796.3	23.7
2015-03-01	11:45:00	812	24.1
2015-03-01	12:00:00	820.4	24.5
2015-03-01	12:15:00	821.2	24.4
2015-03-01	12:30:00	824.1	24.5
2015-03-01	12:45:00	822.7	24.8
2015-03-01	13:00:00	811.5	24.9
2015-03-01	13:15:00	787.7	25.2
2015-03-01	13:30:00	768.9	25.1
2015-03-01	13:45:00	744.4	25.3
2015-03-01	14:00:00	718.9	25.3
2015-03-01	14:15:00	687.8	25.2
2015-03-01	14:30:00	654.4	25
2015-03-01	14:45:00	613	24.9
2015-03-01	15:00:00	574.6	24.9
2015-03-01	15:15:00	532.3	24.7
2015-03-01	15:30:00	481.3	24.6
2015-03-01	15:45:00	432.1	24.4
2015-03-01	16:00:00	380	24.5
2015-03-01	16:15:00	327.3	24.1
2015-03-01	16:30:00	272.8	23.8
2015-03-01	16:45:00	220.1	23.6
2015-03-01	17:00:00	169.4	23.1
2015-03-01	17:15:00	120.8	22.7
2015-03-01	17:30:00	78.9	22.2
2015-03-01	17:45:00	36.2	21.7
2015-03-01	18:00:00	8.6	21.1
2015-03-01	18:15:00	2.3	20.5
2015-03-01	18:30:00	0.5	20
2015-03-01	18:45:00	0.4	19.2
2015-03-01	19:00:00	0.4	18.6
2015-03-01	19:15:00	0.4	18.2
2015-03-01	19:30:00	0.3	17.9
2015-03-01	19:45:00	0.4	16.2
2015-03-01	20:00:00	0.4	15.6
2015-03-01	20:15:00	0.4	15.6
2015-03-01	20:30:00	0.4	15.5
2015-03-01	20:45:00	0.4	15.4
2015-03-01	21:00:00	0.4	14.8
2015-03-01	21:15:00	0.4	13.6
2015-03-01	21:30:00	0.4	13.1
2015-03-01	21:45:00	0.4	12.7
2015-03-01	22:00:00	0.4	12.4
2015-03-01	22:15:00	0.4	12.8
2015-03-01	22:30:00	0.4	12.2
2015-03-01	22:45:00	0.4	11.7
2015-03-01	23:00:00	0.5	11.4
2015-03-01	23:15:00	0.4	10.7
2015-03-01	23:30:00	0.4	10.8
2015-03-01	23:45:00	0.4	10.2
2015-04-01	00:00:00	0.3	11.4
2015-04-01	00:15:00	0.4	11.3
2015-04-01	00:30:00	0.3	10.1
2015-04-01	00:45:00	0.4	9.4
2015-04-01	01:00:00	0.4	9.1
2015-04-01	01:15:00	0.4	9.8
2015-04-01	01:30:00	0.4	9.9
2015-04-01	01:45:00	0.4	10.4
2015-04-01	02:00:00	0.4	10.2
2015-04-01	02:15:00	0.5	10
2015-04-01	02:30:00	0.4	9.6
2015-04-01	02:45:00	0.4	9.1
2015-04-01	03:00:00	0.4	9
2015-04-01	03:15:00	0.4	9
2015-04-01	03:30:00	0.4	8.6
2015-04-01	03:45:00	0.4	8.8
2015-04-01	04:00:00	0.4	8.8
2015-04-01	04:15:00	0.4	9.6
2015-04-01	04:30:00	0.3	9.2
2015-04-01	04:45:00	0.4	9.1
2015-04-01	05:00:00	0.4	9
2015-04-01	05:15:00	0.4	8.3
2015-04-01	05:30:00	0.3	8.7
2015-04-01	05:45:00	0.4	9.3
2015-04-01	06:00:00	0.4	8.5
2015-04-01	06:15:00	0.8	6.7
2015-04-01	06:30:00	4.5	6.9
2015-04-01	06:45:00	12.7	7.7
2015-04-01	07:00:00	21.8	7.7
2015-04-01	07:15:00	112	8.9
2015-04-01	07:30:00	147	11
2015-04-01	07:45:00	196.2	12.5
2015-04-01	08:00:00	249.4	13.8
2015-04-01	08:15:00	303.8	15.8
2015-04-01	08:30:00	355.7	18.1
2015-04-01	08:45:00	407.4	19.4
2015-04-01	09:00:00	457.7	19.8
2015-04-01	09:15:00	504.1	20.4
2015-04-01	09:30:00	552.8	20.9
2015-04-01	09:45:00	598.7	21.5
2015-04-01	10:00:00	640.9	22
2015-04-01	10:15:00	679.8	22.2
2015-04-01	10:30:00	707.5	23.1
2015-04-01	10:45:00	735.2	23.4
2015-04-01	11:00:00	756.5	23.5
2015-04-01	11:15:00	777.2	24.1
2015-04-01	11:30:00	793.6	24.4
2015-04-01	11:45:00	808.2	24.4
2015-04-01	12:00:00	819.1	24.5
2015-04-01	12:15:00	823	24.7
2015-04-01	12:30:00	827.6	24.9
2015-04-01	12:45:00	819.3	25.2
2015-04-01	13:00:00	808.8	25.6
2015-04-01	13:15:00	782.7	25.4
2015-04-01	13:30:00	761.2	25.3
2015-04-01	13:45:00	740	25.3
2015-04-01	14:00:00	713.1	25.3
2015-04-01	14:15:00	680.7	25.6
2015-04-01	14:30:00	651.7	25.2
2015-04-01	14:45:00	614.9	25.6
2015-04-01	15:00:00	565.3	25.3
2015-04-01	15:15:00	523.4	25.2
2015-04-01	15:30:00	480	24.9
2015-04-01	15:45:00	428.3	24.9
2015-04-01	16:00:00	375.4	24.7
2015-04-01	16:15:00	320.7	24.5
2015-04-01	16:30:00	269.8	24.1
2015-04-01	16:45:00	217.7	23.7
2015-04-01	17:00:00	166.8	23.4
2015-04-01	17:15:00	117.1	22.9
2015-04-01	17:30:00	74.3	22.4
2015-04-01	17:45:00	33.6	21.9
2015-04-01	18:00:00	8.9	21.4
2015-04-01	18:15:00	2.3	20.8
2015-04-01	18:30:00	0.5	20.3
2015-04-01	18:45:00	0.4	19.7
2015-04-01	19:00:00	0.4	18.8
2015-04-01	19:15:00	0.4	18.2
2015-04-01	19:30:00	0.4	17.9
2015-04-01	19:45:00	0.4	17.5
2015-04-01	20:00:00	0.4	16.8
2015-04-01	20:15:00	0.4	16
2015-04-01	20:30:00	0.4	16
2015-04-01	20:45:00	0.4	15.6
2015-04-01	21:00:00	0.4	15.1
2015-04-01	21:15:00	0.3	14.7
2015-04-01	21:30:00	0.4	14.4
2015-04-01	21:45:00	0.4	14
2015-04-01	22:00:00	0.4	13.5
2015-04-01	22:15:00	0.3	12.9
2015-04-01	22:30:00	0.4	12.7
2015-04-01	22:45:00	0.3	12.3
2015-04-01	23:00:00	0.3	12
2015-04-01	23:15:00	0.4	11.8
2015-04-01	23:30:00	0.4	11.5
2015-04-01	23:45:00	0.4	11.3
2015-05-01	00:00:00	0.4	11.2
2015-05-01	00:15:00	0.4	10.9
2015-05-01	00:30:00	0.4	10.4
2015-05-01	00:45:00	0.4	10.2
2015-05-01	01:00:00	0.4	9.9
2015-05-01	01:15:00	0.4	9.9
2015-05-01	01:30:00	0.4	10.1
2015-05-01	01:45:00	0.3	9.5
2015-05-01	02:00:00	0.4	9.6
2015-05-01	02:15:00	0.4	10.6
2015-05-01	02:30:00	0.4	12.1
2015-05-01	02:45:00	0.4	12.2
2015-05-01	03:00:00	0.4	12
2015-05-01	03:15:00	0.3	12.1
2015-05-01	03:30:00	0.4	12
2015-05-01	03:45:00	0.3	11.8
2015-05-01	04:00:00	0.4	11.5
2015-05-01	04:15:00	0.4	11.4
2015-05-01	04:30:00	0.4	11.4
2015-05-01	04:45:00	0.4	10.9
2015-05-01	05:00:00	0.4	10
2015-05-01	05:15:00	0.3	9.7
2015-05-01	05:30:00	0.4	9.8
2015-05-01	05:45:00	0.4	9.5
2015-05-01	06:00:00	0.4	8.8
2015-05-01	06:15:00	0.7	8.2
2015-05-01	06:30:00	4	8.3
2015-05-01	06:45:00	12.1	8.4
2015-05-01	07:00:00	20.6	8.5
2015-05-01	07:15:00	100.3	9.4
2015-05-01	07:30:00	144.5	11.1
2015-05-01	07:45:00	194	12.4
2015-05-01	08:00:00	246.2	13.6
2015-05-01	08:15:00	297.9	15.2
2015-05-01	08:30:00	352.3	16.8
2015-05-01	08:45:00	407.2	18
2015-05-01	09:00:00	456.1	19.2
2015-05-01	09:15:00	503.4	19.9
2015-05-01	09:30:00	546.7	20.1
2015-05-01	09:45:00	595.5	20.4
2015-05-01	10:00:00	635.2	20.6
2015-05-01	10:15:00	672.9	21.2
2015-05-01	10:30:00	703.1	21.5
2015-05-01	10:45:00	728.5	21.7
2015-05-01	11:00:00	754.7	21.9
2015-05-01	11:15:00	770.8	22
2015-05-01	11:30:00	783.5	22.4
2015-05-01	11:45:00	794.7	22.9
2015-05-01	12:00:00	803.9	23
2015-05-01	12:15:00	810.1	23
2015-05-01	12:30:00	814.3	23.2
2015-05-01	12:45:00	806.4	23.7
2015-05-01	13:00:00	796.2	23.6
2015-05-01	13:15:00	777	23.9
2015-05-01	13:30:00	758	24.3
2015-05-01	13:45:00	733.1	24
2015-05-01	14:00:00	711.4	23.9
2015-05-01	14:15:00	684.8	24.3
2015-05-01	14:30:00	648.4	24.1
2015-05-01	14:45:00	611.9	24.3
2015-05-01	15:00:00	567.8	24.3
2015-05-01	15:15:00	527.4	24.3
2015-05-01	15:30:00	480	24.2
2015-05-01	15:45:00	428.1	23.8
2015-05-01	16:00:00	376	23.8
2015-05-01	16:15:00	322.6	23.5
2015-05-01	16:30:00	268.5	23.3
2015-05-01	16:45:00	215.7	23
2015-05-01	17:00:00	163.7	22.6
2015-05-01	17:15:00	116	22.1
2015-05-01	17:30:00	74.6	21.7
2015-05-01	17:45:00	35.5	21.2
2015-05-01	18:00:00	10	20.8
2015-05-01	18:15:00	2.4	20.1
2015-05-01	18:30:00	0.5	19.7
2015-05-01	18:45:00	0.4	19.1
2015-05-01	19:00:00	0.4	18.6
2015-05-01	19:15:00	0.3	18.3
2015-05-01	19:30:00	0.4	17.9
2015-05-01	19:45:00	0.4	17.3
2015-05-01	20:00:00	0.4	16.8
2015-05-01	20:15:00	0.4	16.2
2015-05-01	20:30:00	0.4	15.2
2015-05-01	20:45:00	0.3	14.9
2015-05-01	21:00:00	0.4	14.5
2015-05-01	21:15:00	0.4	14.2
2015-05-01	21:30:00	0.5	13.7
2015-05-01	21:45:00	0.4	13.4
2015-05-01	22:00:00	0.4	13
2015-05-01	22:15:00	0.3	12.7
2015-05-01	22:30:00	0.4	12.4
2015-05-01	22:45:00	0.4	11.7
2015-05-01	23:00:00	0.4	11.2
2015-05-01	23:15:00	0.4	10.9
2015-05-01	23:30:00	0.4	10
2015-05-01	23:45:00	0.4	9.2
2015-06-01	00:00:00	0.4	9.2
2015-06-01	00:15:00	0.4	10.5
2015-06-01	00:30:00	0.4	9.6
2015-06-01	00:45:00	0.4	8.5
2015-06-01	01:00:00	0.4	8.4
2015-06-01	01:15:00	0.4	8.2
2015-06-01	01:30:00	0.4	8.3
2015-06-01	01:45:00	0.4	8.5
2015-06-01	02:00:00	0.4	8.8
2015-06-01	02:15:00	0.4	8.9
2015-06-01	02:30:00	0.4	8.5
2015-06-01	02:45:00	0.4	8.7
2015-06-01	03:00:00	0.4	8.8
2015-06-01	03:15:00	0.4	9.4
2015-06-01	03:30:00	0.4	9.9
2015-06-01	03:45:00	0.4	9.4
2015-06-01	04:00:00	0.4	9.3
2015-06-01	04:15:00	0.4	9.3
2015-06-01	04:30:00	0.4	9.5
2015-06-01	04:45:00	0.4	9.3
2015-06-01	05:00:00	0.3	8.7
2015-06-01	05:15:00	0.4	9
2015-06-01	05:30:00	0.4	8.8
2015-06-01	05:45:00	0.4	7.4
2015-06-01	06:00:00	0.4	8.1
2015-06-01	06:15:00	0.7	8.1
2015-06-01	06:30:00	3.9	7.8
2015-06-01	06:45:00	12.9	7.9
2015-06-01	07:00:00	22.9	8
2015-06-01	07:15:00	102.7	9
2015-06-01	07:30:00	153.5	11.4
2015-06-01	07:45:00	194.6	12.6
2015-06-01	08:00:00	240	14
2015-06-01	08:15:00	293.3	15.4
2015-06-01	08:30:00	346.4	16.8
2015-06-01	08:45:00	397.6	17.5
2015-06-01	09:00:00	448.6	18.5
2015-06-01	09:15:00	496.5	19
2015-06-01	09:30:00	541.7	19.7
2015-06-01	09:45:00	584	20.2
2015-06-01	10:00:00	623.6	20.6
2015-06-01	10:15:00	662.2	20.9
2015-06-01	10:30:00	692.9	21.3
2015-06-01	10:45:00	723.9	21.8
2015-06-01	11:00:00	743	22
2015-06-01	11:15:00	765.6	22.4
2015-06-01	11:30:00	783.2	22.8
2015-06-01	11:45:00	791.9	23.2
2015-06-01	12:00:00	805.2	23.1
2015-06-01	12:15:00	812.7	23.5
2015-06-01	12:30:00	818.1	23.8
2015-06-01	12:45:00	808.1	24.3
2015-06-01	13:00:00	802	24.2
2015-06-01	13:15:00	781	24.7
2015-06-01	13:30:00	757.8	24.5
2015-06-01	13:45:00	738.7	24.6
2015-06-01	14:00:00	709.5	25.1
2015-06-01	14:15:00	683.1	25.3
2015-06-01	14:30:00	646.5	25.1
2015-06-01	14:45:00	610.5	25.1
2015-06-01	15:00:00	573.4	25
2015-06-01	15:15:00	525	24.9
2015-06-01	15:30:00	479.8	24.9
2015-06-01	15:45:00	430.2	24.9
2015-06-01	16:00:00	379	24.7
2015-06-01	16:15:00	324.4	24.5
2015-06-01	16:30:00	273.4	24.1
2015-06-01	16:45:00	221.2	23.8
2015-06-01	17:00:00	172	23.5
2015-06-01	17:15:00	123.6	23
2015-06-01	17:30:00	79.3	22.5
2015-06-01	17:45:00	36.9	22
2015-06-01	18:00:00	9.3	21.5
2015-06-01	18:15:00	2.6	20.8
2015-06-01	18:30:00	0.5	20.3
2015-06-01	18:45:00	0.4	19.8
2015-06-01	19:00:00	0.4	19.2
2015-06-01	19:15:00	0.3	18.7
2015-06-01	19:30:00	0.4	18.4
2015-06-01	19:45:00	0.4	17.8
2015-06-01	20:00:00	0.4	17.1
2015-06-01	20:15:00	0.4	16.3
2015-06-01	20:30:00	0.4	15.9
2015-06-01	20:45:00	0.4	15.4
2015-06-01	21:00:00	0.4	15.1
2015-06-01	21:15:00	0.4	14.7
2015-06-01	21:30:00	0.4	14.5
2015-06-01	21:45:00	0.4	13.7
2015-06-01	22:00:00	0.3	13.3
2015-06-01	22:15:00	0.4	12.8
2015-06-01	22:30:00	0.4	12.7
2015-06-01	22:45:00	0.4	12.6
2015-06-01	23:00:00	0.5	11.8
2015-06-01	23:15:00	0.4	11.6
2015-06-01	23:30:00	0.4	11.5
2015-06-01	23:45:00	0.4	10.9
2015-07-01	00:00:00	0.3	10.8
2015-07-01	00:15:00	0.3	10.9
2015-07-01	00:30:00	0.4	10.8
2015-07-01	00:45:00	0.4	10.3
2015-07-01	01:00:00	0.4	10
2015-07-01	01:15:00	0.4	9.6
2015-07-01	01:30:00	0.4	9.2
2015-07-01	01:45:00	0.4	8.9
2015-07-01	02:00:00	0.4	8.8
2015-07-01	02:15:00	0.4	8.9
2015-07-01	02:30:00	0.4	8.9
2015-07-01	02:45:00	0.3	9.2
2015-07-01	03:00:00	0.4	9.2
2015-07-01	03:15:00	0.4	9
2015-07-01	03:30:00	0.4	8.9
2015-07-01	03:45:00	0.4	8.7
2015-07-01	04:00:00	0.4	8.7
2015-07-01	04:15:00	0.4	8.7
2015-07-01	04:30:00	0.4	8.6
2015-07-01	04:45:00	0.4	8.3
2015-07-01	05:00:00	0.4	8.1
2015-07-01	05:15:00	0.4	8
2015-07-01	05:30:00	0.4	7.7
2015-07-01	05:45:00	0.4	7.1
2015-07-01	06:00:00	0.3	7
2015-07-01	06:15:00	0.7	6.7
2015-07-01	06:30:00	3.6	6.4
2015-07-01	06:45:00	10.2	6.5
2015-07-01	07:00:00	17.2	7
2015-07-01	07:15:00	89.8	8.1
2015-07-01	07:30:00	139.5	9.5
2015-07-01	07:45:00	189.8	11.3
2015-07-01	08:00:00	242.3	14
2015-07-01	08:15:00	294.8	15.5
2015-07-01	08:30:00	347.7	16.4
2015-07-01	08:45:00	400.2	17.4
2015-07-01	09:00:00	450	18.5
2015-07-01	09:15:00	496.6	19.3
2015-07-01	09:30:00	542.5	20
2015-07-01	09:45:00	583.3	20.6
2015-07-01	10:00:00	623.6	21.4
2015-07-01	10:15:00	664.4	21.8
2015-07-01	10:30:00	695	22.2
2015-07-01	10:45:00	719.9	22.6
2015-07-01	11:00:00	745	23
2015-07-01	11:15:00	768.9	23.4
2015-07-01	11:30:00	786.6	23.3
2015-07-01	11:45:00	798.5	23.5
2015-07-01	12:00:00	807.2	23.7
2015-07-01	12:15:00	813.9	23.7
2015-07-01	12:30:00	816.5	23.7
2015-07-01	12:45:00	808.7	24
2015-07-01	13:00:00	801.5	24
2015-07-01	13:15:00	780.2	24.4
2015-07-01	13:30:00	763.3	24.4
2015-07-01	13:45:00	738.9	24.7
2015-07-01	14:00:00	713.3	24.8
2015-07-01	14:15:00	686	24.9
2015-07-01	14:30:00	651.4	24.9
2015-07-01	14:45:00	611.1	25
2015-07-01	15:00:00	571.4	24.9
2015-07-01	15:15:00	526	24.7
2015-07-01	15:30:00	482.3	24.8
2015-07-01	15:45:00	433.2	24.8
2015-07-01	16:00:00	383.4	24.7
2015-07-01	16:15:00	330	24.4
2015-07-01	16:30:00	278.2	24.1
2015-07-01	16:45:00	226	23.8
2015-07-01	17:00:00	175.5	23.4
2015-07-01	17:15:00	126.1	22.9
2015-07-01	17:30:00	81.6	22.6
2015-07-01	17:45:00	38.8	21.9
2015-07-01	18:00:00	8.9	21.3
2015-07-01	18:15:00	2.7	20.8
2015-07-01	18:30:00	0.5	20.1
2015-07-01	18:45:00	0.3	19.3
2015-07-01	19:00:00	0.4	18.2
2015-07-01	19:15:00	0.4	17.6
2015-07-01	19:30:00	0.4	17.2
2015-07-01	19:45:00	0.4	16.7
2015-07-01	20:00:00	0.4	16.1
2015-07-01	20:15:00	0.4	15.5
2015-07-01	20:30:00	0.4	14.8
2015-07-01	20:45:00	0.3	14.5
2015-07-01	21:00:00	0.4	13.9
2015-07-01	21:15:00	0.4	13.4
2015-07-01	21:30:00	0.4	13.1
2015-07-01	21:45:00	0.4	13
2015-07-01	22:00:00	0.4	12
2015-07-01	22:15:00	0.4	11.7
2015-07-01	22:30:00	0.3	11.6
2015-07-01	22:45:00	0.4	11
2015-07-01	23:00:00	0.4	10.7
2015-07-01	23:15:00	0.4	10.5
2015-07-01	23:30:00	0.4	10.4
2015-07-01	23:45:00	0.4	10.5
2015-08-01	00:00:00	0.5	10.9
2015-08-01	00:15:00	0.4	10.5
2015-08-01	00:30:00	0.4	10.2
2015-08-01	00:45:00	0.3	10.1
2015-08-01	01:00:00	0.3	10.2
2015-08-01	01:15:00	0.4	10.2
2015-08-01	01:30:00	0.4	10
2015-08-01	01:45:00	0.4	9.4
2015-08-01	02:00:00	0.4	8.8
2015-08-01	02:15:00	0.4	8.9
2015-08-01	02:30:00	0.4	8.8
2015-08-01	02:45:00	0.4	8.6
2015-08-01	03:00:00	0.4	8.4
2015-08-01	03:15:00	0.3	8.4
2015-08-01	03:30:00	0.4	8.4
2015-08-01	03:45:00	0.4	8.6
2015-08-01	04:00:00	0.4	8.9
2015-08-01	04:15:00	0.4	8.6
2015-08-01	04:30:00	0.4	7.9
2015-08-01	04:45:00	0.3	8.2
2015-08-01	05:00:00	0.4	8.6
2015-08-01	05:15:00	0.4	8.2
2015-08-01	05:30:00	0.4	7.9
2015-08-01	05:45:00	0.4	7.6
2015-08-01	06:00:00	0.4	7.4
2015-08-01	06:15:00	0.7	6.6
2015-08-01	06:30:00	3.5	6.6
2015-08-01	06:45:00	10.8	7
2015-08-01	07:00:00	18.7	7.5
2015-08-01	07:15:00	85.7	8.5
2015-08-01	07:30:00	135.3	10.3
2015-08-01	07:45:00	185.2	12.2
2015-08-01	08:00:00	234.1	14.5
2015-08-01	08:15:00	286	16
2015-08-01	08:30:00	337.9	17.8
2015-08-01	08:45:00	391.5	19.1
2015-08-01	09:00:00	443.2	19.6
2015-08-01	09:15:00	491	19.8
2015-08-01	09:30:00	536.5	20.3
2015-08-01	09:45:00	578.8	20.7
2015-08-01	10:00:00	612.8	21.2
2015-08-01	10:15:00	657.3	21.6
2015-08-01	10:30:00	685.2	21.8
2015-08-01	10:45:00	714.6	22.2
2015-08-01	11:00:00	739.4	22.3
2015-08-01	11:15:00	759.2	22.8
2015-08-01	11:30:00	776.4	23
2015-08-01	11:45:00	789.1	23.5
2015-08-01	12:00:00	795.4	23.5
2015-08-01	12:15:00	806.5	23.7
2015-08-01	12:30:00	800.6	24.2
2015-08-01	12:45:00	795.8	24.3
2015-08-01	13:00:00	787.5	24.3
2015-08-01	13:15:00	770.9	24.6
2015-08-01	13:30:00	753.1	24.5
2015-08-01	13:45:00	729.6	24.6
2015-08-01	14:00:00	703.2	24.6
2015-08-01	14:15:00	679.3	24.6
2015-08-01	14:30:00	644.7	24.5
2015-08-01	14:45:00	604.6	24.6
2015-08-01	15:00:00	562.5	24.7
2015-08-01	15:15:00	521.6	24.4
2015-08-01	15:30:00	474.8	24.3
2015-08-01	15:45:00	423.2	24.2
2015-08-01	16:00:00	376.4	24
2015-08-01	16:15:00	324.2	23.7
2015-08-01	16:30:00	272.3	23.5
2015-08-01	16:45:00	222.2	23.2
2015-08-01	17:00:00	171.4	22.8
2015-08-01	17:15:00	123.3	22.5
2015-08-01	17:30:00	81.3	21.9
2015-08-01	17:45:00	41.4	21.4
2015-08-01	18:00:00	9.9	20.9
2015-08-01	18:15:00	2.8	20.4
2015-08-01	18:30:00	0.6	19.9
2015-08-01	18:45:00	0.4	19.6
2015-08-01	19:00:00	0.4	19
2015-08-01	19:15:00	0.3	18.3
2015-08-01	19:30:00	0.4	17.8
2015-08-01	19:45:00	0.4	17.4
2015-08-01	20:00:00	0.4	16.8
2015-08-01	20:15:00	0.4	16.3
2015-08-01	20:30:00	0.4	15.9
2015-08-01	20:45:00	0.4	15.2
2015-08-01	21:00:00	0.4	14.5
2015-08-01	21:15:00	0.4	13.7
2015-08-01	21:30:00	0.4	13.6
2015-08-01	21:45:00	0.4	13.5
2015-08-01	22:00:00	0.4	12.9
2015-08-01	22:15:00	0.4	12.8
2015-08-01	22:30:00	0.4	12.8
2015-08-01	22:45:00	0.3	11.6
2015-08-01	23:00:00	0.4	11.5
2015-08-01	23:15:00	0.3	11.2
2015-08-01	23:30:00	0.3	10.7
2015-08-01	23:45:00	0.4	10.5
2015-09-01	00:00:00	0.4	10.1
2015-09-01	00:15:00	0.4	9.5
2015-09-01	00:30:00	0.4	9.4
2015-09-01	00:45:00	0.4	8.9
2015-09-01	01:00:00	0.3	8.7
2015-09-01	01:15:00	0.4	9.5
2015-09-01	01:30:00	0.4	9.9
2015-09-01	01:45:00	0.4	9.2
2015-09-01	02:00:00	0.3	9.6
2015-09-01	02:15:00	0.4	11.1
2015-09-01	02:30:00	0.4	11.4
2015-09-01	02:45:00	0.4	10.9
2015-09-01	03:00:00	0.4	10.5
2015-09-01	03:15:00	0.4	10
2015-09-01	03:30:00	0.3	9.5
2015-09-01	03:45:00	0.4	10
2015-09-01	04:00:00	0.4	10.3
2015-09-01	04:15:00	0.4	9.4
2015-09-01	04:30:00	0.4	8.8
2015-09-01	04:45:00	0.3	9
2015-09-01	05:00:00	0.4	8.8
2015-09-01	05:15:00	0.4	8.2
2015-09-01	05:30:00	0.4	7.9
2015-09-01	05:45:00	0.4	7.9
2015-09-01	06:00:00	0.4	7.7
2015-09-01	06:15:00	0.7	7.6
2015-09-01	06:30:00	3.6	7.5
2015-09-01	06:45:00	11	7
2015-09-01	07:00:00	19.5	7.6
2015-09-01	07:15:00	93.9	9.1
2015-09-01	07:30:00	153.4	11.6
2015-09-01	07:45:00	193.8	13.7
2015-09-01	08:00:00	238.3	15.8
2015-09-01	08:15:00	291.5	17.2
2015-09-01	08:30:00	345.3	18.3
2015-09-01	08:45:00	396.4	19
2015-09-01	09:00:00	444.9	19.6
2015-09-01	09:15:00	494.4	20.2
2015-09-01	09:30:00	539.5	20.6
2015-09-01	09:45:00	580.8	20.7
2015-09-01	10:00:00	621.4	21.1
2015-09-01	10:15:00	658.2	21.6
2015-09-01	10:30:00	689.9	21.7
2015-09-01	10:45:00	717.9	22.4
2015-09-01	11:00:00	742.5	22.6
2015-09-01	11:15:00	765.4	22.8
2015-09-01	11:30:00	779.1	23.1
2015-09-01	11:45:00	789.4	23.4
2015-09-01	12:00:00	801.3	23.5
2015-09-01	12:15:00	806.8	23.9
2015-09-01	12:30:00	804.6	24.2
2015-09-01	12:45:00	798.1	24.4
2015-09-01	13:00:00	788.3	24.6
2015-09-01	13:15:00	767.6	24.7
2015-09-01	13:30:00	755.4	25.3
2015-09-01	13:45:00	734.2	25.4
2015-09-01	14:00:00	704	25.4
2015-09-01	14:15:00	679.1	25.9
2015-09-01	14:30:00	639.4	25.9
2015-09-01	14:45:00	602.7	25.9
2015-09-01	15:00:00	558.2	25.9
2015-09-01	15:15:00	520	25.9
2015-09-01	15:30:00	472.9	25.6
2015-09-01	15:45:00	424.2	25.6
2015-09-01	16:00:00	377.9	25.3
2015-09-01	16:15:00	325.7	25.3
2015-09-01	16:30:00	274.3	25.1
2015-09-01	16:45:00	219.1	24.8
2015-09-01	17:00:00	167.1	24.4
2015-09-01	17:15:00	119.2	23.9
2015-09-01	17:30:00	76.4	23.4
2015-09-01	17:45:00	38.4	22.9
2015-09-01	18:00:00	10.4	22.3
2015-09-01	18:15:00	2.9	21.8
2015-09-01	18:30:00	0.5	21.1
2015-09-01	18:45:00	0.4	20.7
2015-09-01	19:00:00	0.4	20.2
2015-09-01	19:15:00	0.4	19.7
2015-09-01	19:30:00	0.4	19.2
2015-09-01	19:45:00	0.4	18.5
2015-09-01	20:00:00	0.4	17.4
2015-09-01	20:15:00	0.4	16.7
2015-09-01	20:30:00	0.3	16.3
2015-09-01	20:45:00	0.4	16
2015-09-01	21:00:00	0.4	15.2
2015-09-01	21:15:00	0.4	14.5
2015-09-01	21:30:00	0.4	14.9
2015-09-01	21:45:00	0.4	14.4
2015-09-01	22:00:00	0.4	13.6
2015-09-01	22:15:00	0.4	12.9
2015-09-01	22:30:00	0.4	12.7
2015-09-01	22:45:00	0.5	12.6
2015-09-01	23:00:00	0.4	12.1
2015-09-01	23:15:00	0.4	11.8
2015-09-01	23:30:00	0.4	11.7
2015-09-01	23:45:00	0.4	11.5
2015-10-01	00:00:00	0.4	11.3
2015-10-01	00:15:00	0.4	10.7
2015-10-01	00:30:00	0.4	10.3
2015-10-01	00:45:00	0.5	10.1
2015-10-01	01:00:00	0.4	10
2015-10-01	01:15:00	0.4	9.7
2015-10-01	01:30:00	0.4	9.5
2015-10-01	01:45:00	0.3	9.2
2015-10-01	02:00:00	0.4	9.2
2015-10-01	02:15:00	0.4	9
2015-10-01	02:30:00	0.4	8.5
2015-10-01	02:45:00	0.4	8.5
2015-10-01	03:00:00	0.4	8.5
2015-10-01	03:15:00	0.3	8.2
2015-10-01	03:30:00	0.4	8.1
2015-10-01	03:45:00	0.4	8.1
2015-10-01	04:00:00	0.4	7.9
2015-10-01	04:15:00	0.3	8
2015-10-01	04:30:00	0.4	7.8
2015-10-01	04:45:00	0.4	7.4
2015-10-01	05:00:00	0.3	6.7
2015-10-01	05:15:00	0.4	6.4
2015-10-01	05:30:00	0.3	6.9
2015-10-01	05:45:00	0.3	7
2015-10-01	06:00:00	0.4	6.3
2015-10-01	06:15:00	0.7	6.5
2015-10-01	06:30:00	3.4	6.5
2015-10-01	06:45:00	12.3	6.6
2015-10-01	07:00:00	22.9	6.8
2015-10-01	07:15:00	76.7	7.6
2015-10-01	07:30:00	125.7	9.4
2015-10-01	07:45:00	175.3	11.5
2015-10-01	08:00:00	226.7	12.9
2015-10-01	08:15:00	279.2	14.3
2015-10-01	08:30:00	331.1	16
2015-10-01	08:45:00	382.1	16.8
2015-10-01	09:00:00	430.7	17.7
2015-10-01	09:15:00	476.8	18.4
2015-10-01	09:30:00	523.4	20.3
2015-10-01	09:45:00	565.6	21.4
2015-10-01	10:00:00	606.8	22.2
2015-10-01	10:15:00	642.9	23.2
2015-10-01	10:30:00	671.7	23.9
2015-10-01	10:45:00	697.2	24.3
2015-10-01	11:00:00	728.6	24.6
2015-10-01	11:15:00	742.9	25.1
2015-10-01	11:30:00	743.6	25.5
2015-10-01	11:45:00	756.2	26.2
2015-10-01	12:00:00	780.2	26.2
2015-10-01	12:15:00	786.6	26
2015-10-01	12:30:00	785.5	26.6
2015-10-01	12:45:00	781.9	26.9
2015-10-01	13:00:00	771.5	26.9
2015-10-01	13:15:00	751.7	27.1
2015-10-01	13:30:00	730.4	27.4
2015-10-01	13:45:00	710.7	27.3
2015-10-01	14:00:00	683.8	27.3
2015-10-01	14:15:00	660.4	27.8
2015-10-01	14:30:00	528.5	27
2015-10-01	14:45:00	595.1	27.4
2015-10-01	15:00:00	554.5	27.3
2015-10-01	15:15:00	510.1	27.1
2015-10-01	15:30:00	470.2	27
2015-10-01	15:45:00	413.1	27
2015-10-01	16:00:00	351	26.9
2015-10-01	16:15:00	304.3	26.4
2015-10-01	16:30:00	254.4	26.1
2015-10-01	16:45:00	202.5	25.7
2015-10-01	17:00:00	155.2	25.3
2015-10-01	17:15:00	109.8	24.8
2015-10-01	17:30:00	71.4	24.2
2015-10-01	17:45:00	35.4	23.7
2015-10-01	18:00:00	10.7	23.1
2015-10-01	18:15:00	2.8	22.4
2015-10-01	18:30:00	0.6	22
2015-10-01	18:45:00	0.4	21.5
2015-10-01	19:00:00	0.4	21.1
2015-10-01	19:15:00	0.4	20.9
2015-10-01	19:30:00	0.4	20.4
2015-10-01	19:45:00	0.4	20.1
2015-10-01	20:00:00	0.4	19.9
2015-10-01	20:15:00	0.4	19.1
2015-10-01	20:30:00	0.3	18.4
2015-10-01	20:45:00	0.4	17.7
2015-10-01	21:00:00	0.4	17.3
2015-10-01	21:15:00	0.4	16.7
2015-10-01	21:30:00	0.4	16.3
2015-10-01	21:45:00	0.4	15.8
2015-10-01	22:00:00	0.4	15.4
2015-10-01	22:15:00	0.4	14.9
2015-10-01	22:30:00	0.4	14.6
2015-10-01	22:45:00	0.4	14.4
2015-10-01	23:00:00	0.4	14
2015-10-01	23:15:00	0.4	13.7
2015-10-01	23:30:00	0.3	13.4
2015-10-01	23:45:00	0.4	12.7
2015-11-01	00:00:00	0.4	12.2
2015-11-01	00:15:00	0.4	12
2015-11-01	00:30:00	0.4	11.7
2015-11-01	00:45:00	0.4	11.6
2015-11-01	01:00:00	0.4	11.4
2015-11-01	01:15:00	0.4	11.3
2015-11-01	01:30:00	0.3	11
2015-11-01	01:45:00	0.4	10.9
2015-11-01	02:00:00	0.3	10.7
2015-11-01	02:15:00	0.4	10.7
2015-11-01	02:30:00	0.4	10.2
2015-11-01	02:45:00	0.4	9.8
2015-11-01	03:00:00	0.4	9.5
2015-11-01	03:15:00	0.4	9.9
2015-11-01	03:30:00	0.4	9.7
2015-11-01	03:45:00	0.3	9.6
2015-11-01	04:00:00	0.4	9.3
2015-11-01	04:15:00	0.3	9
2015-11-01	04:30:00	0.4	8.9
2015-11-01	04:45:00	0.4	9.1
2015-11-01	05:00:00	0.4	9.3
2015-11-01	05:15:00	0.4	9.8
2015-11-01	05:30:00	0.4	9.4
2015-11-01	05:45:00	0.4	9.4
2015-11-01	06:00:00	0.4	9.3
2015-11-01	06:15:00	0.6	9.4
2015-11-01	06:30:00	2.8	9.7
2015-11-01	06:45:00	10.3	10.1
2015-11-01	07:00:00	37.2	11.1
2015-11-01	07:15:00	76.1	12.5
2015-11-01	07:30:00	88.7	13.3
2015-11-01	07:45:00	157.9	14.2
2015-11-01	08:00:00	202.6	15
2015-11-01	08:15:00	251.7	15.7
2015-11-01	08:30:00	257.2	16.8
2015-11-01	08:45:00	325.8	17.6
2015-11-01	09:00:00	355	18.4
2015-11-01	09:15:00	404.9	19.1
2015-11-01	09:30:00	397.3	19.2
2015-11-01	09:45:00	580.8	20.3
2015-11-01	10:00:00	502.8	20.4
2015-11-01	10:15:00	645.3	21.2
2015-11-01	10:30:00	570.7	21.6
2015-11-01	10:45:00	747.8	22.4
2015-11-01	11:00:00	622.1	22.5
2015-11-01	11:15:00	585.8	22.8
2015-11-01	11:30:00	576.2	23
2015-11-01	11:45:00	782	23.6
2015-11-01	12:00:00	793.9	24.2
2015-11-01	12:15:00	808.4	24.1
2015-11-01	12:30:00	715.1	24.6
2015-11-01	12:45:00	813.6	24.8
2015-11-01	13:00:00	748.9	24.9
2015-11-01	13:15:00	778.3	25.3
2015-11-01	13:30:00	740.6	25.3
2015-11-01	13:45:00	712.4	25.4
2015-11-01	14:00:00	709	25.6
2015-11-01	14:15:00	623	25.8
2015-11-01	14:30:00	655.7	25.7
2015-11-01	14:45:00	455	25
2015-11-01	15:00:00	551.5	25.1
2015-11-01	15:15:00	498.2	24.9
2015-11-01	15:30:00	310	24.7
2015-11-01	15:45:00	437.2	24.7
2015-11-01	16:00:00	360.8	24.6
2015-11-01	16:15:00	145.1	23.4
2015-11-01	16:30:00	161.7	23.2
2015-11-01	16:45:00	178.1	23.2
2015-11-01	17:00:00	131.6	22.9
2015-11-01	17:15:00	113.5	22.8
2015-11-01	17:30:00	66	22.2
2015-11-01	17:45:00	37.4	21.8
2015-11-01	18:00:00	13.5	21.1
2015-11-01	18:15:00	2.3	20.3
2015-11-01	18:30:00	0.6	19.7
2015-11-01	18:45:00	0.4	19.2
2015-11-01	19:00:00	0.4	18.8
2015-11-01	19:15:00	0.4	18.4
2015-11-01	19:30:00	0.4	18
2015-11-01	19:45:00	0.4	17.7
2015-11-01	20:00:00	0.4	17.4
2015-11-01	20:15:00	0.4	17.2
2015-11-01	20:30:00	0.4	16.9
2015-11-01	20:45:00	0.4	16.6
2015-11-01	21:00:00	0.4	16.3
2015-11-01	21:15:00	0.3	16
2015-11-01	21:30:00	0.4	15.8
2015-11-01	21:45:00	0.4	15.6
2015-11-01	22:00:00	0.4	15.4
2015-11-01	22:15:00	0.4	15.1
2015-11-01	22:30:00	0.4	15
2015-11-01	22:45:00	0.4	15
2015-11-01	23:00:00	0.4	14.9
2015-11-01	23:15:00	0.4	14.8
2015-11-01	23:30:00	0.4	14.6
2015-11-01	23:45:00	0.4	14.5
2015-12-01	00:00:00	0.4	14.2
2015-12-01	00:15:00	0.3	14.1
2015-12-01	00:30:00	0.4	14.1
2015-12-01	00:45:00	0.4	14.2
2015-12-01	01:00:00	0.4	14
2015-12-01	01:15:00	0.3	14
2015-12-01	01:30:00	0.4	14
2015-12-01	01:45:00	0.4	14.2
2015-12-01	02:00:00	0.4	14.3
2015-12-01	02:15:00	0.4	14.4
2015-12-01	02:30:00	0.4	14.6
2015-12-01	02:45:00	0.4	14.6
2015-12-01	03:00:00	0.3	14.4
2015-12-01	03:15:00	0.4	14.2
2015-12-01	03:30:00	0.4	14
2015-12-01	03:45:00	0.4	13.9
2015-12-01	04:00:00	0.4	13.6
2015-12-01	04:15:00	0.4	13.5
2015-12-01	04:30:00	0.4	13.2
2015-12-01	04:45:00	0.3	13.1
2015-12-01	05:00:00	0.4	13.3
2015-12-01	05:15:00	0.4	13
2015-12-01	05:30:00	0.4	12.4
2015-12-01	05:45:00	0.4	12.3
2015-12-01	06:00:00	0.4	12.3
2015-12-01	06:15:00	0.6	12.3
2015-12-01	06:30:00	3	12.4
2015-12-01	06:45:00	12.2	12.7
2015-12-01	07:00:00	28.6	13.1
2015-12-01	07:15:00	59.4	14.1
2015-12-01	07:30:00	99.4	14.9
2015-12-01	07:45:00	207.9	16.1
2015-12-01	08:00:00	244.1	16.7
2015-12-01	08:15:00	270.3	16.9
2015-12-01	08:30:00	312.9	17.3
2015-12-01	08:45:00	361.3	17.9
2015-12-01	09:00:00	411.8	18.7
2015-12-01	09:15:00	458.5	19.5
2015-12-01	09:30:00	504.6	20.3
2015-12-01	09:45:00	545.4	21.1
2015-12-01	10:00:00	585.9	21.5
2015-12-01	10:15:00	625.8	21.9
2015-12-01	10:30:00	346.9	21.2
2015-12-01	10:45:00	264.3	20.5
2015-12-01	11:00:00	636	21.5
2015-12-01	11:15:00	462.2	21.6
2015-12-01	11:30:00	463.9	21
2015-12-01	11:45:00	670.4	22
2015-12-01	12:00:00	686.6	22.2
2015-12-01	12:15:00	458.9	22
2015-12-01	12:30:00	660	22.6
2015-12-01	12:45:00	490.5	22.3
2015-12-01	13:00:00	486.9	22.7
2015-12-01	13:15:00	427.1	22.3
2015-12-01	13:30:00	527.5	22.1
2015-12-01	13:45:00	480.5	22
2015-12-01	14:00:00	719.2	22.9
2015-12-01	14:15:00	456.4	22.5
2015-12-01	14:30:00	504.7	22.9
2015-12-01	14:45:00	488.8	23.1
2015-12-01	15:00:00	582.7	23.1
2015-12-01	15:15:00	416.4	22.8
2015-12-01	15:30:00	431.7	22.8
2015-12-01	15:45:00	425.3	22.8
2015-12-01	16:00:00	373.2	22.9
2015-12-01	16:15:00	322.9	22.8
2015-12-01	16:30:00	272.4	22.4
2015-12-01	16:45:00	227.1	22.2
2015-12-01	17:00:00	174.5	21.9
2015-12-01	17:15:00	124.7	21.5
2015-12-01	17:30:00	80.7	21
2015-12-01	17:45:00	43.1	20.2
2015-12-01	18:00:00	10.3	19.5
2015-12-01	18:15:00	2.8	18.9
2015-12-01	18:30:00	0.6	18.4
2015-12-01	18:45:00	0.4	17.8
2015-12-01	19:00:00	0.3	17.4
2015-12-01	19:15:00	0.4	16.9
2015-12-01	19:30:00	0.3	16.5
2015-12-01	19:45:00	0.5	16.1
2015-12-01	20:00:00	0.4	15.9
2015-12-01	20:15:00	0.4	15.5
2015-12-01	20:30:00	0.4	15.2
2015-12-01	20:45:00	0.4	14.9
2015-12-01	21:00:00	0.5	14.6
2015-12-01	21:15:00	0.3	14.4
2015-12-01	21:30:00	0.4	14.2
2015-12-01	21:45:00	0.4	14.1
2015-12-01	22:00:00	0.4	13.8
2015-12-01	22:15:00	0.4	13.3
2015-12-01	22:30:00	0.4	13.1
2015-12-01	22:45:00	0.4	12.8
2015-12-01	23:00:00	0.4	12.7
2015-12-01	23:15:00	0.4	12.6
2015-12-01	23:30:00	0.5	12.2
2015-12-01	23:45:00	0.4	11.9
2015-01-02	00:00:00	0.4	11.8
2015-01-02	00:15:00	0.4	11.6
2015-01-02	00:30:00	0.3	11.2
2015-01-02	00:45:00	0.3	10.3
2015-01-02	01:00:00	0.4	9.5
2015-01-02	01:15:00	0.4	9.2
2015-01-02	01:30:00	0.4	9
2015-01-02	01:45:00	0.4	9.1
2015-01-02	02:00:00	0.4	8.7
2015-01-02	02:15:00	0.3	8.5
2015-01-02	02:30:00	0.4	8.3
2015-01-02	02:45:00	0.4	8
2015-01-02	03:00:00	0.4	7.9
2015-01-02	03:15:00	0.4	7.9
2015-01-02	03:30:00	0.4	7.7
2015-01-02	03:45:00	0.3	8
2015-01-02	04:00:00	0.4	7.7
2015-01-02	04:15:00	0.4	7
2015-01-02	04:30:00	0.4	8
2015-01-02	04:45:00	0.4	7.7
2015-01-02	05:00:00	0.4	7.2
2015-01-02	05:15:00	0.4	6.7
2015-01-02	05:30:00	0.4	6.3
2015-01-02	05:45:00	0.4	6.2
2015-01-02	06:00:00	0.4	6.1
2015-01-02	06:15:00	0.5	5.5
2015-01-02	06:30:00	2.5	5.3
2015-01-02	06:45:00	7.7	4.9
2015-01-02	07:00:00	17.8	4.8
2015-01-02	07:15:00	33.3	5.8
2015-01-02	07:30:00	136.1	8.5
2015-01-02	07:45:00	185.8	10.8
2015-01-02	08:00:00	238.9	12.5
2015-01-02	08:15:00	292.9	14.9
2015-01-02	08:30:00	347.1	17
2015-01-02	08:45:00	400.2	19.4
2015-01-02	09:00:00	454.6	20.5
2015-01-02	09:15:00	504	21.2
2015-01-02	09:30:00	552.8	22.4
2015-01-02	09:45:00	597.3	22.8
2015-01-02	10:00:00	640.3	23.6
2015-01-02	10:15:00	677.3	23.9
2015-01-02	10:30:00	714.8	24.4
2015-01-02	10:45:00	746.7	24.8
2015-01-02	11:00:00	773.2	25.2
2015-01-02	11:15:00	796.7	25.6
2015-01-02	11:30:00	812.7	26.2
2015-01-02	11:45:00	831.2	26.3
2015-01-02	12:00:00	837.2	26.7
2015-01-02	12:15:00	847.7	26.8
2015-01-02	12:30:00	852.2	26.6
2015-01-02	12:45:00	844.7	26.8
2015-01-02	13:00:00	833.7	26.9
2015-01-02	13:15:00	819.3	27.5
2015-01-02	13:30:00	803.7	27.4
2015-01-02	13:45:00	782.4	27.4
2015-01-02	14:00:00	754.7	27.7
2015-01-02	14:15:00	739.7	27.7
2015-01-02	14:30:00	700.4	27.7
2015-01-02	14:45:00	662.5	27.8
2015-01-02	15:00:00	621.3	27.8
2015-01-02	15:15:00	577.1	28
2015-01-02	15:30:00	530.1	27.6
2015-01-02	15:45:00	479	27.5
2015-01-02	16:00:00	429.5	27.4
2015-01-02	16:15:00	377	27
2015-01-02	16:30:00	326.3	26.7
2015-01-02	16:45:00	268.5	26.5
2015-01-02	17:00:00	215.7	26
2015-01-02	17:15:00	164.3	25.6
2015-01-02	17:30:00	112.1	25.1
2015-01-02	17:45:00	29.2	24.5
2015-01-02	18:00:00	17.8	23.8
2015-01-02	18:15:00	6.3	23.1
2015-01-02	18:30:00	1.6	22.2
2015-01-02	18:45:00	0.4	21.2
2015-01-02	19:00:00	0.4	20.1
2015-01-02	19:15:00	0.4	19.4
2015-01-02	19:30:00	0.4	18.7
2015-01-02	19:45:00	0.4	17.6
2015-01-02	20:00:00	0.4	16.6
2015-01-02	20:15:00	0.4	16
2015-01-02	20:30:00	0.4	15.3
2015-01-02	20:45:00	0.4	14.6
2015-01-02	21:00:00	0.4	14.8
2015-01-02	21:15:00	0.4	14.4
2015-01-02	21:30:00	0.4	14.2
2015-01-02	21:45:00	0.4	13.2
2015-01-02	22:00:00	0.3	12.3
2015-01-02	22:15:00	0.4	11.4
2015-01-02	22:30:00	0.4	10.8
2015-01-02	22:45:00	0.4	10.5
2015-01-02	23:00:00	0.4	10.8
2015-01-02	23:15:00	0.4	10.7
2015-01-02	23:30:00	0.4	10.8
2015-01-02	23:45:00	0.4	10.4
2015-02-02	00:00:00	0.4	10.1
2015-02-02	00:15:00	0.4	9.8
2015-02-02	00:30:00	0.4	9.6
2015-02-02	00:45:00	0.4	9.4
2015-02-02	01:00:00	0.4	9.5
2015-02-02	01:15:00	0.4	8.6
2015-02-02	01:30:00	0.4	8.4
2015-02-02	01:45:00	0.4	8
2015-02-02	02:00:00	0.3	7.7
2015-02-02	02:15:00	0.4	7.9
2015-02-02	02:30:00	0.4	8
2015-02-02	02:45:00	0.4	7.9
2015-02-02	03:00:00	0.3	7.8
2015-02-02	03:15:00	0.4	7.9
2015-02-02	03:30:00	0.4	7.6
2015-02-02	03:45:00	0.4	7.4
2015-02-02	04:00:00	0.4	7.7
2015-02-02	04:15:00	0.4	7.7
2015-02-02	04:30:00	0.4	7.3
2015-02-02	04:45:00	0.4	7.1
2015-02-02	05:00:00	0.4	7.7
2015-02-02	05:15:00	0.4	7.6
2015-02-02	05:30:00	0.4	7.2
2015-02-02	05:45:00	0.4	6.8
2015-02-02	06:00:00	0.4	6.4
2015-02-02	06:15:00	0.5	6.6
2015-02-02	06:30:00	2.5	6.4
2015-02-02	06:45:00	7.7	6.9
2015-02-02	07:00:00	17	6.9
2015-02-02	07:15:00	35.7	7.6
2015-02-02	07:30:00	131	9.4
2015-02-02	07:45:00	180.3	12
2015-02-02	08:00:00	232.5	13.6
2015-02-02	08:15:00	285.9	15.2
2015-02-02	08:30:00	335.1	17.6
2015-02-02	08:45:00	392.8	18.4
2015-02-02	09:00:00	443.2	19.9
2015-02-02	09:15:00	493.4	22.3
2015-02-02	09:30:00	539.5	23.1
2015-02-02	09:45:00	584.2	23.7
2015-02-02	10:00:00	626	24.4
2015-02-02	10:15:00	662.3	24.4
2015-02-02	10:30:00	697.5	24.6
2015-02-02	10:45:00	729.3	25.1
2015-02-02	11:00:00	755.5	25.7
2015-02-02	11:15:00	779.9	26
2015-02-02	11:30:00	799	26.6
2015-02-02	11:45:00	814.5	27.1
2015-02-02	12:00:00	818.7	27.2
2015-02-02	12:15:00	828.1	27.5
2015-02-02	12:30:00	825.7	27.7
2015-02-02	12:45:00	826.5	28.4
2015-02-02	13:00:00	812.4	28.4
2015-02-02	13:15:00	800.6	28.2
2015-02-02	13:30:00	784.3	28.7
2015-02-02	13:45:00	756.2	28.7
2015-02-02	14:00:00	735.6	29.1
2015-02-02	14:15:00	720.4	28.8
2015-02-02	14:30:00	677.2	29
2015-02-02	14:45:00	634	28.7
2015-02-02	15:00:00	594.5	28.6
2015-02-02	15:15:00	552.8	28.8
2015-02-02	15:30:00	506.8	28.5
2015-02-02	15:45:00	460.9	28.5
2015-02-02	16:00:00	409.9	28.5
2015-02-02	16:15:00	354.4	28.3
2015-02-02	16:30:00	301.8	28
2015-02-02	16:45:00	249.3	27.6
2015-02-02	17:00:00	197.1	27.1
2015-02-02	17:15:00	147.2	26.7
2015-02-02	17:30:00	97.7	26.2
2015-02-02	17:45:00	31.9	25.5
2015-02-02	18:00:00	19.2	24.9
2015-02-02	18:15:00	6.9	24
2015-02-02	18:30:00	1.6	23
2015-02-02	18:45:00	0.4	22.4
2015-02-02	19:00:00	0.4	21.7
2015-02-02	19:15:00	0.4	21
2015-02-02	19:30:00	0.4	20.3
2015-02-02	19:45:00	0.4	19.8
2015-02-02	20:00:00	0.4	19.2
2015-02-02	20:15:00	0.4	18.7
2015-02-02	20:30:00	0.4	18.5
2015-02-02	20:45:00	0.3	18.1
2015-02-02	21:00:00	0.4	17.4
2015-02-02	21:15:00	0.4	16.6
2015-02-02	21:30:00	0.4	16.5
2015-02-02	21:45:00	0.4	16.2
2015-02-02	22:00:00	0.4	16.2
2015-02-02	22:15:00	0.4	15.6
2015-02-02	22:30:00	0.4	14.7
2015-02-02	22:45:00	0.4	13.9
2015-02-02	23:00:00	0.4	13.2
2015-02-02	23:15:00	0.3	13.1
2015-02-02	23:30:00	0.4	12.9
2015-02-02	23:45:00	0.4	12.3
2015-03-02	00:00:00	0.4	12.7
2015-03-02	00:15:00	0.4	12.4
2015-03-02	00:30:00	0.4	12.2
2015-03-02	00:45:00	0.4	11.8
2015-03-02	01:00:00	0.4	11.3
2015-03-02	01:15:00	0.4	10.8
2015-03-02	01:30:00	0.4	10.6
2015-03-02	01:45:00	0.4	10.7
2015-03-02	02:00:00	0.4	10.4
2015-03-02	02:15:00	0.4	9.7
2015-03-02	02:30:00	0.4	9.3
2015-03-02	02:45:00	0.4	9.3
2015-03-02	03:00:00	0.4	9.1
2015-03-02	03:15:00	0.4	8.7
2015-03-02	03:30:00	0.4	8.5
2015-03-02	03:45:00	0.4	8.3
2015-03-02	04:00:00	0.4	8
2015-03-02	04:15:00	0.4	7.7
2015-03-02	04:30:00	0.4	8
2015-03-02	04:45:00	0.4	7.8
2015-03-02	05:00:00	0.4	7.7
2015-03-02	05:15:00	0.4	8
2015-03-02	05:30:00	0.3	7.7
2015-03-02	05:45:00	0.4	7.2
2015-03-02	06:00:00	0.4	7
2015-03-02	06:15:00	0.5	7
2015-03-02	06:30:00	2.5	6.9
2015-03-02	06:45:00	9.1	6.8
2015-03-02	07:00:00	18.3	7.1
2015-03-02	07:15:00	38.3	8
2015-03-02	07:30:00	123.7	9.7
2015-03-02	07:45:00	171.5	11
2015-03-02	08:00:00	221.1	12.8
2015-03-02	08:15:00	273.1	14.3
2015-03-02	08:30:00	324.8	15.7
2015-03-02	08:45:00	374.4	18.5
2015-03-02	09:00:00	427.7	19.9
2015-03-02	09:15:00	477.2	21
2015-03-02	09:30:00	524	21.7
2015-03-02	09:45:00	565.1	22.2
2015-03-02	10:00:00	602.8	23
2015-03-02	10:15:00	641.9	23
2015-03-02	10:30:00	671	23.8
2015-03-02	10:45:00	714.2	24.7
2015-03-02	11:00:00	746	25
2015-03-02	11:15:00	767.5	25.5
2015-03-02	11:30:00	788.6	26.3
2015-03-02	11:45:00	798	26.6
2015-03-02	12:00:00	786.6	27.5
2015-03-02	12:15:00	825.1	27.3
2015-03-02	12:30:00	816.6	27.8
2015-03-02	12:45:00	810.6	28.3
2015-03-02	13:00:00	821.9	28.2
2015-03-02	13:15:00	801.2	28.1
2015-03-02	13:30:00	785.7	28.6
2015-03-02	13:45:00	760.9	29.1
2015-03-02	14:00:00	732.4	28.8
2015-03-02	14:15:00	717.5	28.7
2015-03-02	14:30:00	673	29.1
2015-03-02	14:45:00	630.4	29
2015-03-02	15:00:00	591.4	28.6
2015-03-02	15:15:00	551	29.1
2015-03-02	15:30:00	512.2	29.2
2015-03-02	15:45:00	458	28.9
2015-03-02	16:00:00	407	28.7
2015-03-02	16:15:00	353.3	28.8
2015-03-02	16:30:00	297.1	28.4
2015-03-02	16:45:00	246.8	28.3
2015-03-02	17:00:00	194.9	28
2015-03-02	17:15:00	144.2	28
2015-03-02	17:30:00	93.9	27.5
2015-03-02	17:45:00	34.7	26.7
2015-03-02	18:00:00	23	25.8
2015-03-02	18:15:00	8.6	24.5
2015-03-02	18:30:00	2.1	23.6
2015-03-02	18:45:00	0.4	22.9
2015-03-02	19:00:00	0.4	22.2
2015-03-02	19:15:00	0.4	21.6
2015-03-02	19:30:00	0.4	20.9
2015-03-02	19:45:00	0.4	20.3
2015-03-02	20:00:00	0.4	19.7
2015-03-02	20:15:00	0.4	19.2
2015-03-02	20:30:00	0.5	18.5
2015-03-02	20:45:00	0.4	18
2015-03-02	21:00:00	0.4	17.6
2015-03-02	21:15:00	0.4	17.5
2015-03-02	21:30:00	0.4	17.1
2015-03-02	21:45:00	0.4	16.4
2015-03-02	22:00:00	0.4	15.9
2015-03-02	22:15:00	0.4	15.6
2015-03-02	22:30:00	0.4	15
2015-03-02	22:45:00	0.5	14.2
2015-03-02	23:00:00	0.4	13.8
2015-03-02	23:15:00	0.4	13
2015-03-02	23:30:00	0.4	12.6
2015-03-02	23:45:00	0.4	12
2015-04-02	00:00:00	0.4	12.1
2015-04-02	00:15:00	0.3	11.6
2015-04-02	00:30:00	0.4	11.2
2015-04-02	00:45:00	0.4	11
2015-04-02	01:00:00	0.4	11
2015-04-02	01:15:00	0.4	10.7
2015-04-02	01:30:00	0.4	10.4
2015-04-02	01:45:00	0.3	10
2015-04-02	02:00:00	0.4	9.6
2015-04-02	02:15:00	0.4	9.3
2015-04-02	02:30:00	0.4	9.3
2015-04-02	02:45:00	0.4	9.1
2015-04-02	03:00:00	0.4	8.7
2015-04-02	03:15:00	0.4	8.1
2015-04-02	03:30:00	0.4	8.1
2015-04-02	03:45:00	0.4	8
2015-04-02	04:00:00	0.4	8.1
2015-04-02	04:15:00	0.4	7.6
2015-04-02	04:30:00	0.4	7.4
2015-04-02	04:45:00	0.4	7.5
2015-04-02	05:00:00	0.4	6.5
2015-04-02	05:15:00	0.4	5.9
2015-04-02	05:30:00	0.4	6.2
2015-04-02	05:45:00	0.4	6.5
2015-04-02	06:00:00	0.4	6.7
2015-04-02	06:15:00	0.6	6.7
2015-04-02	06:30:00	3.6	6.3
2015-04-02	06:45:00	11.2	6.1
2015-04-02	07:00:00	21.9	6.4
2015-04-02	07:15:00	40.7	7.4
2015-04-02	07:30:00	123.9	9.2
2015-04-02	07:45:00	171.2	10.7
2015-04-02	08:00:00	218.3	12.8
2015-04-02	08:15:00	273.8	15
2015-04-02	08:30:00	329.1	17.9
2015-04-02	08:45:00	384	18.8
2015-04-02	09:00:00	430.5	19.5
2015-04-02	09:15:00	478.8	20.6
2015-04-02	09:30:00	527	21.6
2015-04-02	09:45:00	567	22.3
2015-04-02	10:00:00	617.7	23.2
2015-04-02	10:15:00	647.4	23.8
2015-04-02	10:30:00	674.7	23.8
2015-04-02	10:45:00	709.8	24.5
2015-04-02	11:00:00	739.8	24.9
2015-04-02	11:15:00	759.8	25.3
2015-04-02	11:30:00	777.4	25.6
2015-04-02	11:45:00	791.3	26.2
2015-04-02	12:00:00	796.6	26.3
2015-04-02	12:15:00	815.3	26.4
2015-04-02	12:30:00	817.3	26.7
2015-04-02	12:45:00	812.3	26.9
2015-04-02	13:00:00	797.8	27.9
2015-04-02	13:15:00	784	27.4
2015-04-02	13:30:00	773.5	28
2015-04-02	13:45:00	755.7	28.2
2015-04-02	14:00:00	730.4	28
2015-04-02	14:15:00	703.5	28.8
2015-04-02	14:30:00	670.3	28.2
2015-04-02	14:45:00	631.2	28.1
2015-04-02	15:00:00	595.8	28.5
2015-04-02	15:15:00	545.1	28.8
2015-04-02	15:30:00	503.4	28.9
2015-04-02	15:45:00	455.8	29.1
2015-04-02	16:00:00	405.7	28.8
2015-04-02	16:15:00	354.7	28.7
2015-04-02	16:30:00	295.9	28.4
2015-04-02	16:45:00	247.7	28.2
2015-04-02	17:00:00	197	27.9
2015-04-02	17:15:00	147	27.7
2015-04-02	17:30:00	97.2	27.4
2015-04-02	17:45:00	32.2	26.6
2015-04-02	18:00:00	20.5	26.1
2015-04-02	18:15:00	7.4	25.5
2015-04-02	18:30:00	1.8	23.9
2015-04-02	18:45:00	0.4	22.9
2015-04-02	19:00:00	0.4	22.3
2015-04-02	19:15:00	0.4	21.7
2015-04-02	19:30:00	0.4	21
2015-04-02	19:45:00	0.4	20.5
2015-04-02	20:00:00	0.4	20
2015-04-02	20:15:00	0.3	19.3
2015-04-02	20:30:00	0.4	18.6
2015-04-02	20:45:00	0.4	17.8
2015-04-02	21:00:00	0.4	17.3
2015-04-02	21:15:00	0.4	16.9
2015-04-02	21:30:00	0.4	16.5
2015-04-02	21:45:00	0.4	16
2015-04-02	22:00:00	0.4	15.7
2015-04-02	22:15:00	0.4	15.2
2015-04-02	22:30:00	0.4	14.8
2015-04-02	22:45:00	0.4	14
2015-04-02	23:00:00	0.4	13.7
2015-04-02	23:15:00	0.4	13.7
2015-04-02	23:30:00	0.3	13.4
2015-04-02	23:45:00	0.4	12.9
2015-05-02	00:00:00	0.4	12.5
2015-05-02	00:15:00	0.4	12.2
2015-05-02	00:30:00	0.4	11.7
2015-05-02	00:45:00	0.4	11.2
2015-05-02	01:00:00	0.4	10.7
2015-05-02	01:15:00	0.4	10.6
2015-05-02	01:30:00	0.4	10.6
2015-05-02	01:45:00	0.4	10.1
2015-05-02	02:00:00	0.5	9.4
2015-05-02	02:15:00	0.4	9.3
2015-05-02	02:30:00	0.4	8.8
2015-05-02	02:45:00	0.4	9
2015-05-02	03:00:00	0.4	9
2015-05-02	03:15:00	0.5	8.9
2015-05-02	03:30:00	0.4	9
2015-05-02	03:45:00	0.4	8.7
2015-05-02	04:00:00	0.4	8.4
2015-05-02	04:15:00	0.4	8.1
2015-05-02	04:30:00	0.4	8
2015-05-02	04:45:00	0.4	8
2015-05-02	05:00:00	0.4	7.9
2015-05-02	05:15:00	0.4	7.1
2015-05-02	05:30:00	0.4	6.7
2015-05-02	05:45:00	0.4	6
2015-05-02	06:00:00	0.4	5.8
2015-05-02	06:15:00	0.5	5.9
2015-05-02	06:30:00	2.9	5.4
2015-05-02	06:45:00	10.8	5.4
2015-05-02	07:00:00	21.8	5.8
2015-05-02	07:15:00	41.5	7.1
2015-05-02	07:30:00	114.5	8.7
2015-05-02	07:45:00	163	10.8
2015-05-02	08:00:00	214.2	12.8
2015-05-02	08:15:00	267.2	15.4
2015-05-02	08:30:00	320.3	18
2015-05-02	08:45:00	377.4	19.4
2015-05-02	09:00:00	425.1	19.3
2015-05-02	09:15:00	473.6	20
2015-05-02	09:30:00	521.2	20.9
2015-05-02	09:45:00	563.3	22.1
2015-05-02	10:00:00	605.7	22.4
2015-05-02	10:15:00	648	23.4
2015-05-02	10:30:00	681.1	23.9
2015-05-02	10:45:00	707.8	24.8
2015-05-02	11:00:00	729	24.7
2015-05-02	11:15:00	818.3	25.7
2015-05-02	11:30:00	831.1	26.2
2015-05-02	11:45:00	836.7	26.7
2015-05-02	12:00:00	857.6	26.8
2015-05-02	12:15:00	877	27
2015-05-02	12:30:00	895.8	26.9
2015-05-02	12:45:00	889.4	27.4
2015-05-02	13:00:00	869.8	27.8
2015-05-02	13:15:00	852.5	28
2015-05-02	13:30:00	844.4	28.3
2015-05-02	13:45:00	817.4	28.3
2015-05-02	14:00:00	785.9	28.8
2015-05-02	14:15:00	766.9	28.9
2015-05-02	14:30:00	738.2	29.2
2015-05-02	14:45:00	692.2	28.5
2015-05-02	15:00:00	638.6	28.7
2015-05-02	15:15:00	590	28.5
2015-05-02	15:30:00	515.3	28.6
2015-05-02	15:45:00	598.6	28.6
2015-05-02	16:00:00	517.2	28.7
2015-05-02	16:15:00	350.4	27.5
2015-05-02	16:30:00	341.2	27.5
2015-05-02	16:45:00	282.4	27.2
2015-05-02	17:00:00	220	27.3
2015-05-02	17:15:00	163.9	26.6
2015-05-02	17:30:00	110.7	25.8
2015-05-02	17:45:00	43.5	25.1
2015-05-02	18:00:00	28.7	24.6
2015-05-02	18:15:00	11.2	24.1
2015-05-02	18:30:00	3.2	23.3
2015-05-02	18:45:00	0.4	22.7
2015-05-02	19:00:00	0.5	22
2015-05-02	19:15:00	0.5	21.3
2015-05-02	19:30:00	0.4	20.7
2015-05-02	19:45:00	0.4	20.2
2015-05-02	20:00:00	0.4	19.7
2015-05-02	20:15:00	0.3	19.2
2015-05-02	20:30:00	0.4	18.9
2015-05-02	20:45:00	0.4	18.3
2015-05-02	21:00:00	0.4	17.9
2015-05-02	21:15:00	0.4	17.6
2015-05-02	21:30:00	0.4	17.1
2015-05-02	21:45:00	0.4	16.8
2015-05-02	22:00:00	0.4	16.4
2015-05-02	22:15:00	0.3	16.2
2015-05-02	22:30:00	0.4	16
2015-05-02	22:45:00	0.3	15.7
2015-05-02	23:00:00	0.4	15.3
2015-05-02	23:15:00	0.4	15.2
2015-05-02	23:30:00	0.4	14.8
2015-05-02	23:45:00	0.4	14.5
2015-06-02	00:00:00	0.4	14.2
2015-06-02	00:15:00	0.4	13.6
2015-06-02	00:30:00	0.4	13.1
2015-06-02	00:45:00	0.4	12.7
2015-06-02	01:00:00	0.4	12.5
2015-06-02	01:15:00	0.4	12.4
2015-06-02	01:30:00	0.4	12.2
2015-06-02	01:45:00	0.4	12.1
2015-06-02	02:00:00	0.4	11.7
2015-06-02	02:15:00	0.4	11.5
2015-06-02	02:30:00	0.4	11.4
2015-06-02	02:45:00	0.4	11.2
2015-06-02	03:00:00	0.4	11
2015-06-02	03:15:00	0.4	10.9
2015-06-02	03:30:00	0.4	10.7
2015-06-02	03:45:00	0.4	10.8
2015-06-02	04:00:00	0.4	10.6
2015-06-02	04:15:00	0.4	10.3
2015-06-02	04:30:00	0.4	10.1
2015-06-02	04:45:00	0.4	10.2
2015-06-02	05:00:00	0.4	9.7
2015-06-02	05:15:00	0.4	9.9
2015-06-02	05:30:00	0.4	9.9
2015-06-02	05:45:00	0.4	9.4
2015-06-02	06:00:00	0.3	9.3
2015-06-02	06:15:00	0.6	9.2
2015-06-02	06:30:00	2.9	8.9
2015-06-02	06:45:00	11.6	8.7
2015-06-02	07:00:00	26	9
2015-06-02	07:15:00	56.8	9.7
2015-06-02	07:30:00	140.2	11.5
2015-06-02	07:45:00	192.5	13
2015-06-02	08:00:00	249.3	14.2
2015-06-02	08:15:00	309.2	16.6
2015-06-02	08:30:00	368.9	18.7
2015-06-02	08:45:00	425.6	20.2
2015-06-02	09:00:00	480.2	21.4
2015-06-02	09:15:00	534	22.1
2015-06-02	09:30:00	587.4	23.3
2015-06-02	09:45:00	635.4	23.5
2015-06-02	10:00:00	677.7	24.3
2015-06-02	10:15:00	718.8	25.1
2015-06-02	10:30:00	754.5	25.9
2015-06-02	10:45:00	787.4	26.1
2015-06-02	11:00:00	814.6	26.7
2015-06-02	11:15:00	842	26.5
2015-06-02	11:30:00	867.4	27.3
2015-06-02	11:45:00	878.2	27.5
2015-06-02	12:00:00	890.2	27.3
2015-06-02	12:15:00	895.5	27.7
2015-06-02	12:30:00	895.9	27.6
2015-06-02	12:45:00	887.8	27.7
2015-06-02	13:00:00	883.2	27.8
2015-06-02	13:15:00	867.9	28.4
2015-06-02	13:30:00	853.4	28.6
2015-06-02	13:45:00	830	28.9
2015-06-02	14:00:00	809	28.8
2015-06-02	14:15:00	775.8	29.3
2015-06-02	14:30:00	746.8	28.9
2015-06-02	14:45:00	693.7	29
2015-06-02	15:00:00	664.4	28.6
2015-06-02	15:15:00	620.5	28.8
2015-06-02	15:30:00	575.4	28.6
2015-06-02	15:45:00	524	28.3
2015-06-02	16:00:00	468.9	28.2
2015-06-02	16:15:00	412.2	28.2
2015-06-02	16:30:00	355.1	27.9
2015-06-02	16:45:00	297.2	27.8
2015-06-02	17:00:00	240	27.5
2015-06-02	17:15:00	181	27
2015-06-02	17:30:00	124.8	26.5
2015-06-02	17:45:00	44.2	25.5
2015-06-02	18:00:00	28.7	25
2015-06-02	18:15:00	10.4	24.1
2015-06-02	18:30:00	3.2	23.3
2015-06-02	18:45:00	0.5	22.6
2015-06-02	19:00:00	0.3	22
2015-06-02	19:15:00	0.4	21.4
2015-06-02	19:30:00	0.3	20.8
2015-06-02	19:45:00	0.4	20.3
2015-06-02	20:00:00	0.4	19.8
2015-06-02	20:15:00	0.4	19.3
2015-06-02	20:30:00	0.4	18.8
2015-06-02	20:45:00	0.4	18.3
2015-06-02	21:00:00	0.4	17.8
2015-06-02	21:15:00	0.4	17.4
2015-06-02	21:30:00	0.4	16.9
2015-06-02	21:45:00	0.4	16.6
2015-06-02	22:00:00	0.4	16.4
2015-06-02	22:15:00	0.4	16.4
2015-06-02	22:30:00	0.4	16.2
2015-06-02	22:45:00	0.3	15.9
2015-06-02	23:00:00	0.3	15.7
2015-06-02	23:15:00	0.4	15.1
2015-06-02	23:30:00	0.4	15.3
2015-06-02	23:45:00	0.4	14.8
2015-07-02	00:00:00	0.4	14.4
2015-07-02	00:15:00	0.4	13.6
2015-07-02	00:30:00	0.4	12.6
2015-07-02	00:45:00	0.4	11.9
2015-07-02	01:00:00	0.4	10.9
2015-07-02	01:15:00	0.4	10.5
2015-07-02	01:30:00	0.4	10.5
2015-07-02	01:45:00	0.3	10.4
2015-07-02	02:00:00	0.4	10.2
2015-07-02	02:15:00	0.4	9.7
2015-07-02	02:30:00	0.4	9.2
2015-07-02	02:45:00	0.4	8.9
2015-07-02	03:00:00	0.4	8.5
2015-07-02	03:15:00	0.4	7.9
2015-07-02	03:30:00	0.4	7.9
2015-07-02	03:45:00	0.4	7.6
2015-07-02	04:00:00	0.4	7.2
2015-07-02	04:15:00	0.4	7.7
2015-07-02	04:30:00	0.4	7.5
2015-07-02	04:45:00	0.4	7.2
2015-07-02	05:00:00	0.4	7.1
2015-07-02	05:15:00	0.4	7.1
2015-07-02	05:30:00	0.4	6.9
2015-07-02	05:45:00	0.4	6.5
2015-07-02	06:00:00	0.4	6
2015-07-02	06:15:00	0.7	5.2
2015-07-02	06:30:00	3.9	5.2
2015-07-02	06:45:00	12.2	5.1
2015-07-02	07:00:00	27.2	5.2
2015-07-02	07:15:00	63.9	6.6
2015-07-02	07:30:00	154.3	9.1
2015-07-02	07:45:00	207.2	11.1
2015-07-02	08:00:00	258.1	13.1
2015-07-02	08:15:00	317.6	14.5
2015-07-02	08:30:00	384.1	16.7
2015-07-02	08:45:00	449.7	17.8
2015-07-02	09:00:00	508	19
2015-07-02	09:15:00	553.6	19.9
2015-07-02	09:30:00	602.4	21.2
2015-07-02	09:45:00	650.8	22.3
2015-07-02	10:00:00	700.5	23.9
2015-07-02	10:15:00	739.1	24.3
2015-07-02	10:30:00	774.4	24.8
2015-07-02	10:45:00	805	25.3
2015-07-02	11:00:00	831.7	25.7
2015-07-02	11:15:00	855.9	25.8
2015-07-02	11:30:00	874.5	26.1
2015-07-02	11:45:00	890.5	26.7
2015-07-02	12:00:00	901.8	26.8
2015-07-02	12:15:00	908.6	27.2
2015-07-02	12:30:00	907	27.6
2015-07-02	12:45:00	898.3	27.6
2015-07-02	13:00:00	899.1	27.9
2015-07-02	13:15:00	877.4	28.2
2015-07-02	13:30:00	863.2	28.1
2015-07-02	13:45:00	841.3	28.3
2015-07-02	14:00:00	814.4	28.2
2015-07-02	14:15:00	771	28.3
2015-07-02	14:30:00	749.7	28.1
2015-07-02	14:45:00	713.9	28.3
2015-07-02	15:00:00	674.1	28.5
2015-07-02	15:15:00	598.2	28.6
2015-07-02	15:30:00	563.8	28.5
2015-07-02	15:45:00	513.3	28.6
2015-07-02	16:00:00	460.9	28.4
2015-07-02	16:15:00	402	28.6
2015-07-02	16:30:00	331.3	28.3
2015-07-02	16:45:00	289	27.9
2015-07-02	17:00:00	228.7	27.8
2015-07-02	17:15:00	173.3	27.4
2015-07-02	17:30:00	119.3	26.9
2015-07-02	17:45:00	48.1	26.3
2015-07-02	18:00:00	28.6	25.6
2015-07-02	18:15:00	8.9	24.9
2015-07-02	18:30:00	1.6	23.9
2015-07-02	18:45:00	0.5	22.7
2015-07-02	19:00:00	0.4	21.9
2015-07-02	19:15:00	0.4	21
2015-07-02	19:30:00	0.4	20.3
2015-07-02	19:45:00	0.4	19.6
2015-07-02	20:00:00	0.4	19
2015-07-02	20:15:00	0.4	18.6
2015-07-02	20:30:00	0.4	18.3
2015-07-02	20:45:00	0.4	18.1
2015-07-02	21:00:00	0.4	17.8
2015-07-02	21:15:00	0.4	17.6
2015-07-02	21:30:00	0.3	17
2015-07-02	21:45:00	0.4	16.6
2015-07-02	22:00:00	0.4	16.5
2015-07-02	22:15:00	0.4	15.9
2015-07-02	22:30:00	0.4	15.5
2015-07-02	22:45:00	0.4	15
2015-07-02	23:00:00	0.3	14.3
2015-07-02	23:15:00	0.4	13.9
2015-07-02	23:30:00	0.4	13.5
2015-07-02	23:45:00	0.4	13.1
2015-08-02	00:00:00	0.4	12.9
2015-08-02	00:15:00	0.4	12.5
2015-08-02	00:30:00	0.4	11.9
2015-08-02	00:45:00	0.3	11.3
2015-08-02	01:00:00	0.4	10.8
2015-08-02	01:15:00	0.4	10.6
2015-08-02	01:30:00	0.4	10.1
2015-08-02	01:45:00	0.4	9.7
2015-08-02	02:00:00	0.4	9.2
2015-08-02	02:15:00	0.3	9.3
2015-08-02	02:30:00	0.4	9
2015-08-02	02:45:00	0.3	8.8
2015-08-02	03:00:00	0.4	8.9
2015-08-02	03:15:00	0.4	8.6
2015-08-02	03:30:00	0.4	8.4
2015-08-02	03:45:00	0.4	8.1
2015-08-02	04:00:00	0.4	7.7
2015-08-02	04:15:00	0.3	7.3
2015-08-02	04:30:00	0.4	6.8
2015-08-02	04:45:00	0.4	6.6
2015-08-02	05:00:00	0.4	6.7
2015-08-02	05:15:00	0.4	6.6
2015-08-02	05:30:00	0.4	5.9
2015-08-02	05:45:00	0.4	5.7
2015-08-02	06:00:00	0.4	5.7
2015-08-02	06:15:00	0.7	5.3
2015-08-02	06:30:00	3.7	5.3
2015-08-02	06:45:00	12.8	5.4
2015-08-02	07:00:00	26.1	6.1
2015-08-02	07:15:00	59.4	7
2015-08-02	07:30:00	142.6	8.5
2015-08-02	07:45:00	210.9	10.3
2015-08-02	08:00:00	266.1	12
2015-08-02	08:15:00	326.9	13.6
2015-08-02	08:30:00	389.7	15.9
2015-08-02	08:45:00	442.3	17.5
2015-08-02	09:00:00	484.2	19.5
2015-08-02	09:15:00	519.4	20.6
2015-08-02	09:30:00	568.9	21.1
2015-08-02	09:45:00	629.4	21.6
2015-08-02	10:00:00	681.8	22.6
2015-08-02	10:15:00	723.5	23.3
2015-08-02	10:30:00	756.7	24
2015-08-02	10:45:00	794.6	24.2
2015-08-02	11:00:00	809.3	24.6
2015-08-02	11:15:00	843.9	25.2
2015-08-02	11:30:00	865.4	25.7
2015-08-02	11:45:00	865.6	26.2
2015-08-02	12:00:00	878.9	26.5
2015-08-02	12:15:00	889.3	26.4
2015-08-02	12:30:00	892	27.2
2015-08-02	12:45:00	893.2	26.9
2015-08-02	13:00:00	869.9	27.3
2015-08-02	13:15:00	868.3	27.7
2015-08-02	13:30:00	858.7	28
2015-08-02	13:45:00	835.3	28.7
2015-08-02	14:00:00	804.3	28.7
2015-08-02	14:15:00	784.9	28.3
2015-08-02	14:30:00	764	28.4
2015-08-02	14:45:00	719.9	28.8
2015-08-02	15:00:00	679.5	28.6
2015-08-02	15:15:00	623.5	28.5
2015-08-02	15:30:00	570	28.8
2015-08-02	15:45:00	511.1	28.5
2015-08-02	16:00:00	453.2	28.7
2015-08-02	16:15:00	404.7	28.8
2015-08-02	16:30:00	353.3	29
2015-08-02	16:45:00	299.1	28.8
2015-08-02	17:00:00	232.5	28.7
2015-08-02	17:15:00	169.3	28.2
2015-08-02	17:30:00	119.5	27.5
2015-08-02	17:45:00	60.2	27
2015-08-02	18:00:00	36.2	26.2
2015-08-02	18:15:00	10.2	25.1
2015-08-02	18:30:00	1.7	23.3
2015-08-02	18:45:00	0.4	21.8
2015-08-02	19:00:00	0.4	21.8
2015-08-02	19:15:00	0.5	20.8
2015-08-02	19:30:00	0.4	21.7
2015-08-02	19:45:00	0.4	22.2
2015-08-02	20:00:00	0.4	20.9
2015-08-02	20:15:00	0.4	19.8
2015-08-02	20:30:00	0.3	20.9
2015-08-02	20:45:00	0.4	19.8
2015-08-02	21:00:00	0.4	18.8
2015-08-02	21:15:00	0.4	17.9
2015-08-02	21:30:00	0.4	17.3
2015-08-02	21:45:00	0.4	17.2
2015-08-02	22:00:00	0.4	17.4
2015-08-02	22:15:00	0.5	16.7
2015-08-02	22:30:00	0.4	16
2015-08-02	22:45:00	0.4	15.9
2015-08-02	23:00:00	0.4	15
2015-08-02	23:15:00	0.4	15.1
2015-08-02	23:30:00	0.4	14.2
2015-08-02	23:45:00	0.4	13.7
2015-09-02	00:00:00	0.4	13.3
2015-09-02	00:15:00	0.4	12.3
2015-09-02	00:30:00	0.4	12.2
2015-09-02	00:45:00	0.4	12.1
2015-09-02	01:00:00	0.4	11.6
2015-09-02	01:15:00	0.4	11.3
2015-09-02	01:30:00	0.4	10.9
2015-09-02	01:45:00	0.4	10.5
2015-09-02	02:00:00	0.4	10.2
2015-09-02	02:15:00	0.3	10
2015-09-02	02:30:00	0.4	9.5
2015-09-02	02:45:00	0.4	9.1
2015-09-02	03:00:00	0.4	9
2015-09-02	03:15:00	0.4	8.6
2015-09-02	03:30:00	0.4	8.1
2015-09-02	03:45:00	0.5	8
2015-09-02	04:00:00	0.4	7.8
2015-09-02	04:15:00	0.4	7.5
2015-09-02	04:30:00	0.4	7.1
2015-09-02	04:45:00	0.4	7
2015-09-02	05:00:00	0.4	6.7
2015-09-02	05:15:00	0.4	6.3
2015-09-02	05:30:00	0.4	6.2
2015-09-02	05:45:00	0.4	5.9
2015-09-02	06:00:00	0.4	5.9
2015-09-02	06:15:00	0.6	5.5
2015-09-02	06:30:00	4.1	5.4
2015-09-02	06:45:00	13.2	5.6
2015-09-02	07:00:00	24	6.2
2015-09-02	07:15:00	67.1	7.6
2015-09-02	07:30:00	143.8	9.4
2015-09-02	07:45:00	205	11.3
2015-09-02	08:00:00	260.8	13.5
2015-09-02	08:15:00	320.2	15.7
2015-09-02	08:30:00	377.7	18.7
2015-09-02	08:45:00	433	20.9
2015-09-02	09:00:00	495.3	21.1
2015-09-02	09:15:00	549.1	21.5
2015-09-02	09:30:00	599.9	21.8
2015-09-02	09:45:00	647.1	22.5
2015-09-02	10:00:00	688.6	22.8
2015-09-02	10:15:00	729.6	23.3
2015-09-02	10:30:00	764.4	23.5
2015-09-02	10:45:00	797.1	23.9
2015-09-02	11:00:00	829	24.3
2015-09-02	11:15:00	843.1	24.9
2015-09-02	11:30:00	867.4	25.3
2015-09-02	11:45:00	877.7	25.8
2015-09-02	12:00:00	893.7	26.1
2015-09-02	12:15:00	901.2	26.5
2015-09-02	12:30:00	902.6	26.5
2015-09-02	12:45:00	883	26.9
2015-09-02	13:00:00	887.6	27.5
2015-09-02	13:15:00	880.1	27.7
2015-09-02	13:30:00	849.3	27.5
2015-09-02	13:45:00	829	28.2
2015-09-02	14:00:00	808.4	28.6
2015-09-02	14:15:00	786.9	28.8
2015-09-02	14:30:00	739.9	28.4
2015-09-02	14:45:00	710.1	28.9
2015-09-02	15:00:00	662.2	28.6
2015-09-02	15:15:00	610	28.7
2015-09-02	15:30:00	559.2	29
2015-09-02	15:45:00	515	28.8
2015-09-02	16:00:00	462.7	29.1
2015-09-02	16:15:00	408.4	29
2015-09-02	16:30:00	344.3	28.6
2015-09-02	16:45:00	281.1	28.6
2015-09-02	17:00:00	225.8	28.5
2015-09-02	17:15:00	172.6	28
2015-09-02	17:30:00	121.5	27.7
2015-09-02	17:45:00	68	27.2
2015-09-02	18:00:00	33.4	26.4
2015-09-02	18:15:00	9.9	25.4
2015-09-02	18:30:00	2	24
2015-09-02	18:45:00	0.5	22.8
[truncated: 25,654 more rows]
